# Supplementary material for: Somatic Disease in Survivors of Childhood Malignant Bone Tumors in the Nordic Countries
Source: MDPI journal article supplement (doi:10.3390/cancers13184505), 2021-09-07
Supplement: s1 [file s1]

**Table S1.** Grouping of malignant bone tumors in the present study.

|                           | ICCC-1 (ICD-O-1 codes) <sup>a</sup>                                                                                                                                              | ICCC-3 (ICD-O-3 codes) <sup>b</sup>                                                                                           |
|---------------------------|----------------------------------------------------------------------------------------------------------------------------------------------------------------------------------|-------------------------------------------------------------------------------------------------------------------------------|
|                           | <b>VIIIa</b> ( <i>n</i> = 242)                                                                                                                                                   |                                                                                                                               |
|                           | <b>VIIIb</b> with the following ICD-O-1 morphology codes:<br>92203 Chondrosarcoma, NOS ( <i>n</i> = 10)<br>92403 Mesenchymal chondrosarcoma ( <i>n</i> = 1)                      | <b>VIIIa</b> ( <i>n</i> = 127)                                                                                                |
|                           | <b>VIIIb</b> with the following C24/histology codes:<br>73.6 ( <i>n</i> = 21):<br>Chondrosarcoma<br>Chondromyosarcoma<br>Chondrofibrosarcoma                                     | <b>VIIIb</b> with the following ICD-O-3 morphology codes:<br>92203 Chondrosarcoma, NOS ( <i>n</i> = 24)                       |
| Osteosarcoma <sup>c</sup> |                                                                                                                                                                                  | <b>VIIIId/VIIIe</b> with the following ICD-O-3 morphology codes:<br>92503 Giant cell tumor of bone, malignant ( <i>n</i> = 2) |
|                           | <b>VIIIId</b> with the following ICD-O-1 morphology codes:<br>92503 Giant cell tumor of bone, malignant ( <i>n</i> = 1)                                                          |                                                                                                                               |
|                           | <b>VIIIId</b> with the following C24/histology codes:<br>74.6 ( <i>n</i> = 6 ):<br>Giant cell tumor of bone, malignant<br>Giant cell sarcoma of bone<br>Osteoclastoma, malignant |                                                                                                                               |
| Ewing sarcoma             | <b>VIIIc</b> ( <i>n</i> = 143)                                                                                                                                                   | <b>VIIIc</b> ( <i>n</i> = 37)                                                                                                 |

<sup>a</sup> ICC-1 was applied for Denmark (1943–2003) and Sweden (1958–2008) in the ALiCCS-cohort; <sup>b</sup> ICC-3 was applied for Denmark (2004–2008), Finland (1953–2008), and Iceland (1955–2008) in the ALiCCS-cohort; <sup>c</sup> Including osteosarcoma-like bone sarcomas treated as osteosarcoma.

**Table S2.** Definition of the 12 main diagnostic groups and 120 disease categories according to the disease codes of the International Classification of Diseases, 7<sup>th</sup> to 10<sup>th</sup> revisions (ICD-7 to ICD-10).<sup>a</sup>

| Main diagnostic group and disease categories                              | ICD-7                                       | ICD-8                                                | ICD-9                                                | ICD-10                                                           |
|---------------------------------------------------------------------------|---------------------------------------------|------------------------------------------------------|------------------------------------------------------|------------------------------------------------------------------|
| <b>Infectious and parasitic diseases</b>                                  |                                             |                                                      |                                                      |                                                                  |
| Intestinal infectious diseases                                            | 040–049                                     | 000–009                                              | 001–009                                              | A00-A09                                                          |
| Tuberculosis                                                              | 001–019                                     | 010–019                                              | 010–018                                              | A15-A19                                                          |
| Sepsis                                                                    | 053                                         | 038                                                  | 038                                                  | A40-A41                                                          |
| Erysipelas                                                                | 052                                         | 035                                                  | 035                                                  | A46                                                              |
| Other bacterial diseases                                                  | 050–051, 054–057, 060–061                   | 030–034, 036–037, 039                                | 030–034, 036–037, 039–041                            | A30-A39, A42-A45, A47-A49                                        |
| Enterovirus diseases of CNS                                               | 080–083                                     | 040–046, 062–066                                     | 045–049, 062–064                                     | A80-A81, A83-A89                                                 |
| Herpes zoster                                                             | 088                                         | 053                                                  | 053                                                  | B02                                                              |
| Other viral diseases with exanthema                                       | 084–087, 096.0, 096.3                       | 050–052, 054–057                                     | 050–052, 054–057                                     | B00-B01, B03-B09                                                 |
| Infectious hepatitis, HIV (only in ICD-9 and 10) and other viral diseases | 089, 092–095, 096.1–096.2, 096.4–096.9      | 070–079                                              | 042, 070–079                                         | A70-A71, A82, B15-B34                                            |
| Syphilis and other venereal diseases                                      | 020–039, 070–074                            | 090–104                                              | 090–099                                              | A50-A70, A74                                                     |
| Mycoses                                                                   | 121–124                                     | 110–117                                              | 110–118                                              | B35-B49                                                          |
| Other infectious and parasitic diseases                                   | 058–059, 062–064, 090–091, 100–120, 125–138 | 020–027, 060–061, 067–068, 080–089, 120–129, 130–136 | 020–027, 060–061, 065–066, 080–088, 100–104, 120–136 | A20-A28, A75-A79, A90-A99, B50-B83, B85-B99                      |
| <b>Malignant neoplasms (new primary cancer)</b>                           |                                             |                                                      |                                                      |                                                                  |
| Cancer of buccal cavity and pharynx                                       |                                             |                                                      |                                                      | C00-C14, C46.2                                                   |
| Cancer of digestive organs                                                |                                             |                                                      |                                                      | C15-C26                                                          |
| Cancer of respiratory system and intrathoracic organs                     |                                             |                                                      |                                                      | C30-C39, C45.0                                                   |
| Cancer of bones, joints and articular cartilage                           |                                             |                                                      |                                                      | C40-C41                                                          |
| Malignant melanoma of skin                                                |                                             |                                                      |                                                      | C43                                                              |
|                                                                           |                                             |                                                      |                                                      | C45.1-C45.9, C46.1, C46.3, C46.7, C46.8, C46.9, C47-C49, B21.0   |
| Mesothelium and connective tissue                                         |                                             |                                                      |                                                      | C50                                                              |
| Cancer of breast                                                          |                                             |                                                      |                                                      | C51-C58                                                          |
| Cancer of female genital organs incl. skin                                |                                             |                                                      |                                                      | C60-C63                                                          |
| Cancer of male genital organs incl. skin                                  |                                             |                                                      |                                                      | C64-C68, D30.1-D30.9, D41.4                                      |
| Cancer of urinary tract                                                   |                                             |                                                      |                                                      | C69-C72, C75.1-C75.3, D32-D33, D35.2-D35.4, D42-D43, D44.3-D44.5 |
| Cancer of eye, brain and other parts of central nervous system            |                                             |                                                      |                                                      |                                                                  |

|                                                                                      |                                  |                                                                             |                                                                                      |                                                                               |
|--------------------------------------------------------------------------------------|----------------------------------|-----------------------------------------------------------------------------|--------------------------------------------------------------------------------------|-------------------------------------------------------------------------------|
| Cancer of endocrine organs                                                           |                                  |                                                                             |                                                                                      | C73-C74, C75.0, C75.4-C75.9                                                   |
| Malignant lymphomas                                                                  |                                  |                                                                             |                                                                                      | C81, C82-C85, C88.3-C88.9                                                     |
| Multiple myeloma                                                                     |                                  |                                                                             |                                                                                      | C90, C88.0-C88.2                                                              |
| Leukemia                                                                             |                                  |                                                                             |                                                                                      | C91-C96                                                                       |
| Ill-defined and unspecified cancer                                                   |                                  |                                                                             |                                                                                      | C76-C80                                                                       |
| <b>Benign neoplasms</b>                                                              |                                  |                                                                             |                                                                                      |                                                                               |
|                                                                                      | 210–222, 224–229                 | 210–222, 223.0, 224, 225.5–<br>225.6, 226.0–226.1, 226.4–<br>226.9, 227–228 | 210–222, 223.0, 224, 225.1,<br>225.8–225.9, 226, 227.0–<br>227.2227.5–227.9, 228–229 | D00-D05, D07-D08, D09.2-<br>D30.0, D31, D34, D35.0-D35.1,<br>D35.5-D35.9, D36 |
| <b>Endocrine diseases, nutritional deficiencies and<br/>other metabolic diseases</b> |                                  |                                                                             |                                                                                      |                                                                               |
| Diseases of the thyroid gland                                                        | 250–254                          | 240–242, 244–246                                                            | 240–242, 244–246                                                                     | E01-E02, E03.2-E03.9, E04-E07                                                 |
| Diabetes mellitus                                                                    | 260                              | 249, 250                                                                    | 250                                                                                  | E10-E14                                                                       |
| Other disorders of glucose regulation and<br>pancreatic internal secretion           | 270                              | 251                                                                         | 251                                                                                  | E15-E16                                                                       |
| Pituitary hypofunction                                                               |                                  | 253.1                                                                       | 253.2–253.3, 253.5                                                                   | E23.0-E23.3                                                                   |
| Ovarian dysfunction                                                                  | 275                              | 256                                                                         | 256                                                                                  | E28                                                                           |
| Testicular dysfunction                                                               | 276                              | 257                                                                         | 257                                                                                  | E29                                                                           |
| Disorders of other endocrine organs                                                  | 271–274, 277                     | 252, 253.0, 253.2–253.9, 254–<br>255, 258                                   | 252, 253.0–253.1, 253.4,<br>253.6–253.9, 254, 255, 258–<br>259, 271                  | E20-E22, E23.6-E23.9, E24-<br>E27, E30-E35                                    |
| Nutritional deficiencies                                                             | 280–286                          | 260–269                                                                     | 260–269                                                                              | E40-E64                                                                       |
| Other metabolic disorders                                                            | 289                              | 275.4–275.9, 276, 278–279                                                   | 273, 275, 276, 277.1–277.9                                                           | E73, E86-E90                                                                  |
| Male sterility                                                                       | 616                              | 606                                                                         | 606                                                                                  | N46                                                                           |
| Abnormal menstruation                                                                | 634                              | 626                                                                         | 626                                                                                  | N91-N92                                                                       |
| Female infertility                                                                   | 636                              | 628                                                                         | 628                                                                                  | N97                                                                           |
| Other disorders of female reproductive system                                        | 635                              | 627                                                                         | 627                                                                                  | N93-N96, N98                                                                  |
| <b>Diseases of blood and blood-forming organs</b>                                    |                                  |                                                                             |                                                                                      |                                                                               |
| Anemias                                                                              | 290–291, 292.1–292.5, 292.7, 293 | 280–281, 283–285                                                            | 280–281, 283–285                                                                     | D50-D54, D59-D64                                                              |
| Coagulation defects, purpura and other<br>hemorrhagic conditions                     | 295, 296                         | 286–287                                                                     | 286–287                                                                              | D65-D69                                                                       |
| Agranulocytosis                                                                      | 297                              | 288                                                                         | 288                                                                                  | D70-D72                                                                       |
| Other diseases of blood and blood-forming organs                                     | 299                              | 289                                                                         | 289                                                                                  | D73-D79, D86, D89                                                             |
| <b>Diseases of nervous system and sense organs</b>                                   |                                  |                                                                             |                                                                                      |                                                                               |
| Meningitis                                                                           | 340                              | 320                                                                         | 320–322                                                                              | G00-G03                                                                       |
| Other inflammatory diseases of CNS                                                   | 341–344                          | 321–324                                                                     | 323–326                                                                              | G04-G09                                                                       |

|                                                            |                   |                           |                                                             |                                                        |
|------------------------------------------------------------|-------------------|---------------------------|-------------------------------------------------------------|--------------------------------------------------------|
| Multiple sclerosis and other demyelinating diseases of CNS | 345               | 340–341                   | 340–341                                                     | G35–G37                                                |
| Parkinson disease and other movement disorders             | 350               | 342                       | 332, 333.1–333.3, 333.5–333.8, 333.90–333.91, 333.93–333.99 | G20–G22, G24–G26                                       |
| Epilepsy                                                   | 353               | 345                       | 345                                                         | G40–G41                                                |
| Migraine and other diseases of brain and spinal cord       | 354–357           | 346–347, 349              | 346–349                                                     | G13, G43–G44, G46–G47                                  |
| Senile and presenile dementia                              |                   | 290                       | 290, 331.0                                                  | F00–F03, G30–G32                                       |
| Diseases of nerves and peripheral ganglia                  | 352, 360–369      | 344, 350–358              | 350–359                                                     | G50–G59, G61–G73, G81–G89, G90.0, G90.2–G90.9, G91–G99 |
| Inflammatory and other diseases of the eye                 | 370–384, 386–389  | 360–373, 375–379          | 360–365, 367–379                                            | H00–H22, H30–H36, H40–H59                              |
| Cataract                                                   | 385               | 374                       | 366                                                         | H25–H28                                                |
| Inflammatory diseases of ear                               | 390–394           | 380–384                   | 380–384                                                     | H60–H75                                                |
| Meniere’s disease and otosclerosis                         | 395               | 385–386                   | 386–387                                                     | H80–H82                                                |
| Other diseases of ear and deafness                         | 396–398           | 387–389                   | 385, 388–389                                                | H83–H95                                                |
| <b>Diseases of circulatory system</b>                      |                   |                           |                                                             |                                                        |
| Acute rheumatic fever                                      | 400–402           | 390–392                   | 390–392                                                     | I00–I02                                                |
| Chronic rheumatic heart disease                            | 410–416           | 393–398                   | 393–398                                                     | I05–I09                                                |
| Hypertensive disease                                       | 440–447           | 400–404                   | 401–405                                                     | I10–I15                                                |
| Ischemic heart disease                                     | 420               | 410–414                   | 410–414, 429.2, 429.7                                       | I20–I25                                                |
| Pulmonary heart disease                                    | 465, 434.0        | 426, 450                  | 415–417                                                     | I26–I28                                                |
| Pericardial, myocardial and endocardial disease            | 421, 430–432      | 420–423                   | 420–423, 424.9, 429.0                                       | I30–I33, I38–I41, I51.4                                |
| Valvular disease (non-rheumatic)                           |                   | 424                       | 424.0–424.3                                                 | I34–I37                                                |
| Heart failure                                              | 422, 434.1–434.4  | 425, 427.0–427.1, 428–429 | 425, 428, 429.1, 429.3, 429.8–429.9                         | I42–I43, I50, I51.5, I51.7                             |
| Conduction disorders                                       | 433               | 427.2–427.9               | 426–427                                                     | I44–I49                                                |
| Cerebrovascular disease                                    | 330–334           | 430–438                   | 430–438                                                     | I60–I69, G45                                           |
| Diseases of arteries, arterioles and capillaries           | 450–456, 467.1    | 440–445, 447–448          | 440–445, 447–448                                            | I70–I79                                                |
| Venous and lymphatic disease                               | 460–464, 466, 468 | 451–457                   | 451–457                                                     | I80–I89                                                |
| Other complications of the circulatory system              | 467.0, 467.2      | 446, 458                  | 429.4–429.6, 446, 458–459                                   | I51.0–I51.3, I51.6, I51.8–I51.9, I52, I95–I99, M30     |
| <b>Diseases of respiratory system</b>                      |                   |                           |                                                             |                                                        |
| Influenza                                                  | 480–483           | 470–474                   | 487                                                         | J10–J11                                                |
| Acute upper respiratory infections                         | 470–475           | 460–465                   | 460–465                                                     | J00–J06                                                |
| Other disorders of upper respiratory tract                 | 240, 510–517      | 500–508                   | 470–478                                                     | J30–J39                                                |

|                                                       |                     |                         |                                        |                                                                      |
|-------------------------------------------------------|---------------------|-------------------------|----------------------------------------|----------------------------------------------------------------------|
| Pneumonia                                             | 490–493, 525        | 480–486, 517            | 480–486                                | J12–J18                                                              |
| Abscess of lung and pyothorax                         | 518–519, 521        | 510–511, 513            | 510–511, 513                           | J85–J86, J90                                                         |
| Bronchitis and emphysema                              | 500–502, 526, 527.1 | 466, 490–492, 518       | 466, 490–492, 494, 496,<br>518.1–518.2 | J20–J22, J40–J44, J47, J98.2–<br>J98.3                               |
| Asthma                                                | 241                 | 493                     | 493                                    | J45–J46                                                              |
| Lung diseases due to external agents                  | 523–524             | 515–516                 | 495, 500–508                           | J60–J70                                                              |
| Interstitial pulmonary diseases and pulmonary edema   | 522                 | 514, 519.1              | 514–516, 518.3–518.4                   | J81–J84                                                              |
| Pneumothorax                                          | 520                 | 512                     | 512                                    | J93                                                                  |
| Respiratory failure                                   | 527.0               | 519.0                   | 518.0, 518.5–518.8                     | J96, J98.1                                                           |
| Other diseases of respiratory system                  | 527.2               | 519.2–519.9             | 517, 519                               | J80, J91–J92, J94–J95, J98.0,<br>J98.4–J98.9, J99                    |
| <b>Diseases of digestive organs</b>                   |                     |                         |                                        |                                                                      |
| Diseases of the teeth and supporting structures       | 530–535             | 520–525                 | 520–525                                | K00–K08                                                              |
| Other diseases of the oral cavity and salivary glands | 536–538             | 526–529                 | 526–529                                | K09–K14                                                              |
| Diseases of esophagus                                 | 539                 | 530                     | 530                                    | K20–K23                                                              |
| Diseases of stomach and duodenum                      | 540–545             | 531–537                 | 531–537                                | K25–K31                                                              |
| Appendicitis                                          | 550–553             | 540–543                 | 540–543                                | K35–K38                                                              |
| Hernia of abdominal cavity                            | 560–561             | 550–553                 | 550–553                                | K40–K46                                                              |
| Noninfective enteritis and colitis                    | 571, 572            | 561, 563                | 555–558                                | K50–K52                                                              |
| Paralytic ileus and intestinal obstruction            | 570                 | 560                     | 560                                    | K56                                                                  |
| Diseases of anal and rectal regions                   | 574, 575            | 565, 566                | 565, 566                               | K60–K62                                                              |
| Diseases of peritoneum                                | 576, 577            | 567–568                 | 567, 568                               | K65–K67                                                              |
| Other diseases of digestive system                    | 573, 578            | 562, 564, 569           | 562, 564, 569, 578–579                 | K55, K57–K59, K63, K90–K93                                           |
| Diseases of liver                                     | 580–583             | 570–573                 | 570–573                                | K70–K77                                                              |
| Diseases of gallbladder and biliary ducts             | 584–586             | 574–576                 | 574–576                                | K80–K83, K87                                                         |
| Diseases of pancreas                                  | 587                 | 577                     | 577                                    | K85–K86                                                              |
| <b>Diseases of urinary system and genital organs</b>  |                     |                         |                                        |                                                                      |
| Glomerular diseases                                   | 590–593             | 580–583                 | 580–583, 599.7                         | N00–N01, N03–N05, N02.0–<br>N02.8, N06.0–N06.8, N07.0–<br>N07.8, N08 |
| Acute renal failure                                   |                     | 593.1                   | 584                                    | N17, N28.0                                                           |
| Chronic kidney disease                                | 594, 600.0          | 584, 590.0–590.1, 593.0 | 585–587, 589, 590.0, 590.8,<br>593.2   | N11.8–N11.9, N12, N18–N19,<br>N26–N27, N28.1                         |
| Urolithiasis                                          | 602, 604            | 592, 594                | 592, 594                               | N20–N22                                                              |

|                                                               |                                                 |                                                             |                                                                               |                                                                                                                                                         |
|---------------------------------------------------------------|-------------------------------------------------|-------------------------------------------------------------|-------------------------------------------------------------------------------|---------------------------------------------------------------------------------------------------------------------------------------------------------|
| Obstructive uropathy                                          | 601, 608                                        | 591, 598, 593.3–593.4, 596.2                                | 591, 593.3–593.5, 596.0, 598, 599.6                                           | N11.0–N11.1, N13.0–N13.5, N13.8–N13.9, N32.0, N35                                                                                                       |
| Infections of the urinary system                              | 605, 607, 600.1–600.2                           | 595, 597, 590.2, 590.9, 599.0                               | 590.1–590.3, 590.9, 595, 597, 599.0                                           | N10, N13.6, N15.1, N16.0, N29.0–N29.1, N30, N33.0, N34, N37.0, N39.0                                                                                    |
| Other and unspecified disorders of the urinary system         | 603, 606, 609                                   | 593.2, 593.5, 596.0–596.1, 596.3, 596.9, 599.1–599.2, 599.9 | 588, 593.0–593.1, 593.6–593.9, 596.1–596.9, 599.1–599.5, 599.81–599.89, 599.9 | N02.9, N06.9, N07.9, N13.7, N14, N15.0, N15.8–N15.9, N16.1–N16.8, N23, N25, N28.8–N28.9, N29.8, N31, N32.1–N32.9, N33.8, N36, N37.8, N39.1, N39.2–N39.9 |
| Diseases of prostate                                          | 610–612                                         | 600–602                                                     | 600–602                                                                       | N40–N42                                                                                                                                                 |
| Hydrocele and spermatocele                                    | 613                                             | 603                                                         | 603                                                                           | N43                                                                                                                                                     |
| Orchitis and epididymis                                       | 614                                             | 604                                                         | 604                                                                           | N45                                                                                                                                                     |
| Other diseases of male genital organs                         | 615, 617                                        | 605, 607                                                    | 605, 607–608                                                                  | N44, N47–N51                                                                                                                                            |
| Chronic cystic disease and other diseases of breast           | 620–621                                         | 610–611                                                     | 610–611                                                                       | N60–N64                                                                                                                                                 |
| Inflammatory diseases of female pelvic organs                 | 622–624, 630                                    | 612–614, 616.0, 620, 622                                    | 614–616                                                                       | N70–N77                                                                                                                                                 |
| Endometriosis                                                 |                                                 | 625.3                                                       | 617                                                                           | N80                                                                                                                                                     |
| Noninflammatory disorders of female genital tract             | 625, 626, 631–633, 637                          | 615, 616.1–616.9, 621, 623–624, 625.0–625.2, 625.9, 629     | 618–625, 629                                                                  | N81–N90                                                                                                                                                 |
| <b>Diseases of skin and subcutaneous tissue</b>               |                                                 |                                                             |                                                                               |                                                                                                                                                         |
| Infections of skin and subcutaneous tissue                    | 690–698                                         | 680–686                                                     | 680–686                                                                       | L00–L08                                                                                                                                                 |
| Other inflammatory conditions of skin and subcutaneous tissue | 700–701, 702.0–702.4, 702.6–702.9, 703–708, 711 | 690–691, 692.0–692.6, 692.8–692.9, 693–698, 708             | 690–691, 692.00–692.81, 692.83–692.89, 693–698, 702, 708                      | L10–L57, L59                                                                                                                                            |
| Radiodermatitis                                               | 702.5                                           | 692.7                                                       | 692.82                                                                        | L58                                                                                                                                                     |
| Disorders of skin appendages (hair, nails, sweat glands)      | 712–714                                         | 703–706                                                     | 703–706                                                                       | L60–L75                                                                                                                                                 |
| Other disorders of the skin and subcutaneous tissue           | 709–710, 715–716                                | 700–702, 707, 709                                           | 700–701, 707, 709                                                             | L80–L99                                                                                                                                                 |
| <b>Diseases of bone, joint and soft tissue</b>                |                                                 |                                                             |                                                                               |                                                                                                                                                         |
| Arthritis and rheumatism                                      | 288, 720–727                                    | 274, 710–718                                                | 274, 710–719, 725–727, 729.0                                                  | M00–M19, M79.0                                                                                                                                          |
| Osteomyelitis and other diseases of bone and joint            | 730–738                                         | 720–729                                                     | 720–724, 730–733                                                              | M20–M25, M40–M54, M80–M94                                                                                                                               |
| Other diseases of musculoskeletal system                      | 740–749                                         | 730–738                                                     | 728, 729.1–729.9, 734–739                                                     | M31–M36, M60–M77, M79.1–M79.9, M95–M99                                                                                                                  |

<sup>a</sup>The following chapters in ICD-8 were not included in the analyses: 5 (Psychiatric diseases), 11 (Diseases in pregnancy, during birth and perinatal diseases), 14 (Congenital malformations), 15 (Certain causes of diseases in the perinatal period and death due to this), 16 (Symptoms and ill-defined conditions), 17 (Injuries), and 18 (External cause of accident). Diseases with the following ICD-10 codes were also not included in the analyses: C97 (Cancer arisen independently at several locations), D37-D48 (Non-melanoma skin cancer), C44, C46.0 (Neoplasms of unknown character), E65-E68 (Obesity (ICD-8: 277 and ICD-9: 278)).

**Table S3.** Rate ratios (RRs) and rate differences (RDs) of hospital contact per 1000 person years and 95% confidence intervals (CIs) for first diagnosis of each of the 120 specific disease categories for survivors compared with the matched comparisons.\*.

|                                                                           | Number of hospital contacts<br>by survivors | RR (95% CI)           | RD (95% CI)           |
|---------------------------------------------------------------------------|---------------------------------------------|-----------------------|-----------------------|
| <b>Infectious and parasitic diseases</b>                                  | 55                                          | 2.28 (1.67 to 3.12)   | 3.73 (1.91 to 5.56)   |
| Intestinal infectious diseases                                            | 13                                          | 1.40 (0.76 to 2.58)   | 0.43 (−0.44 to 1.29)  |
| Sepsis                                                                    | 12                                          | 5.39 (2.42 to 12.00)  | 1.11 (0.33 to 1.90)   |
| Erysipelas                                                                | 17                                          | 9.27 (4.24 to 20.24)  | 1.75 (0.81 to 2.69)   |
| Other bacterial diseases                                                  | 8                                           | 4.33 (1.71 to 10.98)  | 0.70 (0.06 to 1.35)   |
| Infectious hepatitis, HIV (only in ICD-9 and 10) and other viral diseases | 7                                           | 1.25 (0.55 to 2.84)   | 0.16 (−0.47 to 0.79)  |
| <b>Malignant neoplasms</b>                                                | 25                                          | 3.24 (1.98 to 5.32)   | 2.00 (0.83 to 3.16)   |
| Cancer of breast                                                          | 6                                           | 4.04 (1.40 to 11.65)  | 0.51 (−0.04 to 1.07)  |
| Cancer of female genital organs incl. skin                                | 6                                           | 2.70 (1.01 to 7.20)   | 0.43 (−0.14 to 1.00)  |
| <b>Benign neoplasms</b>                                                   | 22                                          | 2.05 (1.26 to 3.35)   | 1.31 (0.20 to 2.41)   |
| <b>Endocrine diseases, nutritional deficiencies and other metabolic</b>   | 25                                          | 1.62 (1.04 to 2.54)   | 1.12 (−0.09 to 2.32)  |
| Diseases of the thyroid gland                                             | 5                                           | 3.84 (1.22 to 12.10)  | 0.42 (−0.09 to 0.93)  |
| Diabetes mellitus                                                         | 5                                           | 1.34 (0.50 to 3.57)   | 0.14 (−0.39 to 0.67)  |
| Abnormal menstruation                                                     | 5                                           | 1.49 (0.55 to 4.02)   | 0.19 (−0.34 to 0.72)  |
| <b>Diseases of blood and blood-forming organs</b>                         | 9                                           | 4.03 (1.70 to 9.57)   | 0.77 (0.09 to 1.45)   |
| Anemias                                                                   | 5                                           | 5.37 (1.55 to 18.55)  | 0.46 (−0.04 to 0.96)  |
| <b>Diseases of nervous system and sense organs</b>                        | 25                                          | 1.30 (0.84 to 2.01)   | 0.66 (−0.55 to 1.88)  |
| Diseases of nerves and peripheral ganglia                                 | 13                                          | 3.19 (1.61 to 6.34)   | 1.02 (0.19 to 1.85)   |
| Inflammatory diseases of ear                                              | 5                                           | 1.79 (0.65 to 4.94)   | 0.25 (−0.27 to 0.78)  |
| <b>Diseases of circulatory system</b>                                     | 36                                          | 2.09 (1.42 to 3.06)   | 2.19 (0.75 to 3.62)   |
| Pericardial, myocardial and endocardial disease                           | 7                                           | 6.27 (2.11 to 18.67)  | 0.67 (0.07 to 1.26)   |
| Heart failure                                                             | 9                                           | 16.18 (4.38 to 59.75) | 0.96 (0.29 to 1.63)   |
| Conduction disorders                                                      | 6                                           | 1.35 (0.55 to 3.29)   | 0.18 (−0.41 to 0.76)  |
| Cerebrovascular disease                                                   | 6                                           | 3.58 (1.27 to 10.05)  | 0.49 (−0.07 to 1.05)  |
| Diseases of arteries, arterioles and capillaries                          | 5                                           | 5.39 (1.56 to 18.63)  | 0.46 (−0.04 to 0.97)  |
| Venous and lymphatic disease                                              | 6                                           | 0.91 (0.38 to 2.17)   | −0.06 (−0.66 to 0.53) |
| <b>Diseases of respiratory system</b>                                     | 48                                          | 1.00 (0.73 to 1.36)   | −0.01 (−1.78 to 1.76) |
| Acute upper respiratory infections                                        | 9                                           | 0.59 (0.30 to 1.18)   | −0.71 (−1.48 to 0.06) |



|                                                                     | Number of hospital contacts<br>by survivors | RR (95% CI)          | RD (95% CI)            |
|---------------------------------------------------------------------|---------------------------------------------|----------------------|------------------------|
| Other disorders of upper<br>respiratory tract                       | 11                                          | 0.52 (0.28 to 0.96)  | -1.19 (-2.06 to -0.31) |
| Pneumonia                                                           | 20                                          | 2.29 (1.36 to 3.86)  | 1.29 (0.25 to 2.33)    |
| <b>Diseases of digestive organs</b>                                 | 70                                          | 1.48 (1.13 to 1.92)  | 2.76 (0.64 to 4.89)    |
| Diseases of the teeth and<br>supporting structures                  | 15                                          | 3.68 (1.91 to 7.10)  | 1.25 (0.36 to 2.14)    |
| Diseases of esophagus                                               | 5                                           | 2.99 (1.00 to 8.91)  | 0.38 (-0.14 to 0.89)   |
| Appendicitis                                                        | 15                                          | 1.04 (0.60 to 1.82)  | 0.07 (-0.88 to 1.02)   |
| Hernia of abdominal cavity                                          | 5                                           | 0.65 (0.26 to 1.65)  | -0.30 (-0.87 to 0.26)  |
| Noninfective enteritis and<br>colitis                               | 5                                           | 0.86 (0.34 to 2.22)  | -0.09 (-0.64 to 0.46)  |
| Other diseases of digestive<br>system                               | 9                                           | 2.20 (1.01 to 4.78)  | 0.56 (-0.14 to 1.26)   |
| Diseases of gallbladder and<br>biliary ducts                        | 18                                          | 2.11 (1.22 to 3.63)  | 1.08 (0.09 to 2.07)    |
| <b>Diseases of urinary system<br/>and genital organs</b>            | 42                                          | 1.62 (1.15 to 2.28)  | 1.91 (0.31 to 3.51)    |
| Urolithiasis                                                        | 5                                           | 1.92 (0.69 to 5.34)  | 0.27 (-0.25 to 0.80)   |
| Chronic cystic disease and<br>other diseases of breast              | 6                                           | 1.19 (0.49 to 2.88)  | 0.11 (-0.48 to 0.69)   |
| Noninflammatory disorders<br>of female genital tract                | 11                                          | 1.40 (0.72 to 2.73)  | 0.36 (-0.43 to 1.15)   |
| <b>Diseases of skin and<br/>subcutaneous tissue</b>                 | 36                                          | 3.55 (2.34 to 5.39)  | 3.10 (1.66 to 4.55)    |
| Infections of skin and<br>subcutaneous tissue                       | 17                                          | 3.09 (1.70 to 5.60)  | 1.33 (0.37 to 2.29)    |
| Other inflammatory<br>conditions of skin and<br>subcutaneous tissue | 7                                           | 2.53 (1.03 to 6.21)  | 0.49 (-0.13 to 1.10)   |
| Other disorders of the skin<br>and subcutaneous tissue              | 10                                          | 6.79 (2.68 to 17.20) | 0.98 (0.26 to 1.70)    |
| <b>Diseases of bone, joint and<br/>soft tissue</b>                  | 67                                          | 1.94 (1.47 to 2.57)  | 3.98 (1.93 to 6.03)    |
| Arthritis and rheumatism                                            | 15                                          | 1.41 (0.80 to 2.49)  | 0.50 (-0.42 to 1.43)   |
| Osteomyelitis and other<br>diseases of bone and joint               | 41                                          | 1.99 (1.39 to 2.84)  | 2.38 (0.85 to 3.92)    |
| Other diseases of<br>musculoskeletal system                         | 20                                          | 2.33 (1.38 to 3.94)  | 1.33 (0.27 to 2.40)    |

\*Only diseases for which survivors had five or more hospital contacts are shown.
